# Supplementary material for: A new method to investigate the catalytic mechanism of YhdE pyrophosphatase by using a pyrophosphate fluorescence probe
Source: PubMed Central journal article supplement (PMC5557916; doi:10.1038/s41598-017-08368-1), 2017-08-15
Supplement: 41598_2017_8368_MOESM1_ESM.pdf [file 41598_2017_8368_MOESM1_ESM.pdf]

## Supplementary Information

### **A new method to investigate the catalytic mechanism of YhdE pyrophosphatase by using a pyrophosphate fluorescence probe**

Qingya Shen<sup>1</sup>, Hongwei Tan<sup>1</sup>, Guo-wen Xing<sup>1</sup>, Jimin Zheng<sup>1, \*</sup> and Zongchao Jia<sup>2, \*</sup>

<sup>1</sup> College of Chemistry, Beijing Normal University, Beijing, 100875, China

<sup>2</sup> Department of Biochemical and Molecular Science, Queen University, Kingston, Ontario, K7L 3N6, Canada

\* To whom correspondence should be addressed. Tel: +86-010-58806002; Email: [jimin\\_z@bnu.edu.cn](mailto:jimin_z@bnu.edu.cn)

Correspondence may also be addressed to [jia@queensu.ca](mailto:jia@queensu.ca)

## Supplementary Figures

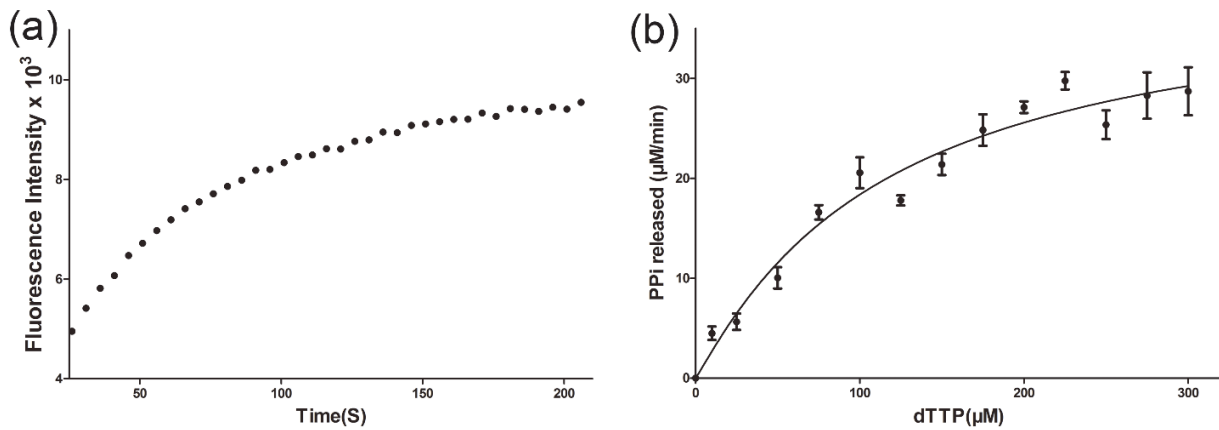

**Figure S1** Pyrophosphatase assays of YhdE by fluorescence probe. (a) Real-time assays of YhdE pyrophosphatase activity by fluorescence sensor. The prior 26 seconds data could not be obtained due to the response time of the person and machine. (b) dTTPase activity of YhdE. For kinetic measurements, 75 nM YhdE was assayed under standard conditions with increasing concentrations of the substrate dTTP.

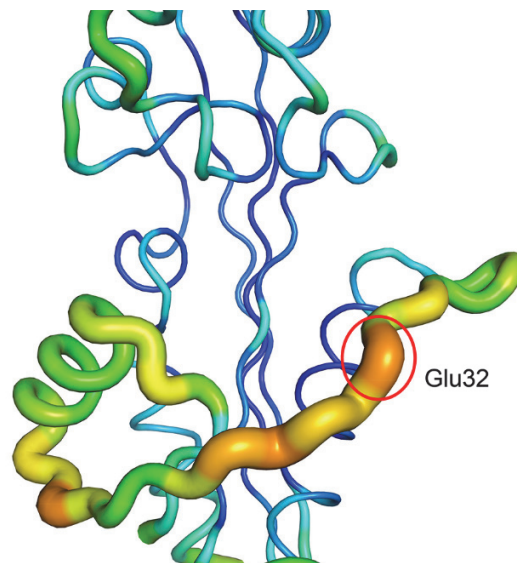

**Figure S2** The B factor putty cartoon of YhdE\_E33A structure soaked with dTTP (chain B). The rainbow colours from red to blue and the thickness of residues from thick to thin represent B factor from high to low. Glu32 highlighted in the red circle indicates its high B factor.

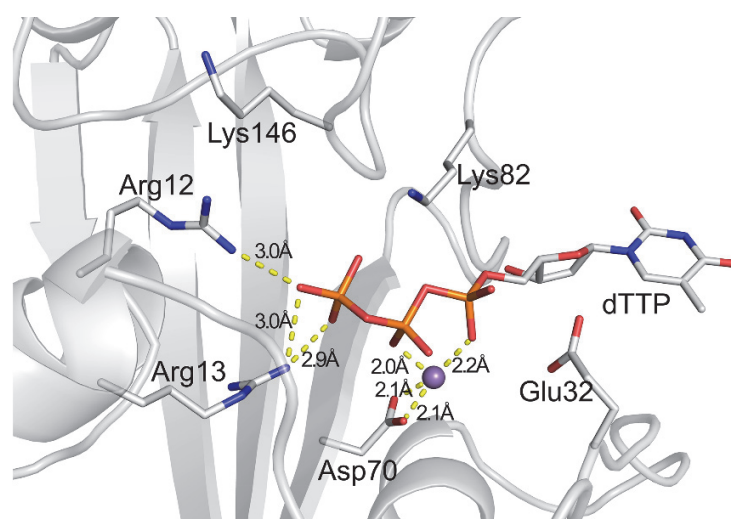

**Figure S3** The active site pocket of YhdE\_E33A after docking. dTTP and residues Arg12, Arg13, Glu32, Asp70, Lys82 and Lys146 are shown as sticks along with protein backbone as cartoon (grey). The hydrogen bonds between YhdE residues with dTTP, as well as interactions with  $Mn^{2+}$  ion are represented in dash lines (yellow). The triphosphate group of dTTP forms many interactions with basic residues of YhdE. The carboxyl group of Asp70 together with  $\alpha$ - and  $\beta$ -phosphoryl groups of dTTP coordinate with  $Mn^{2+}$ .

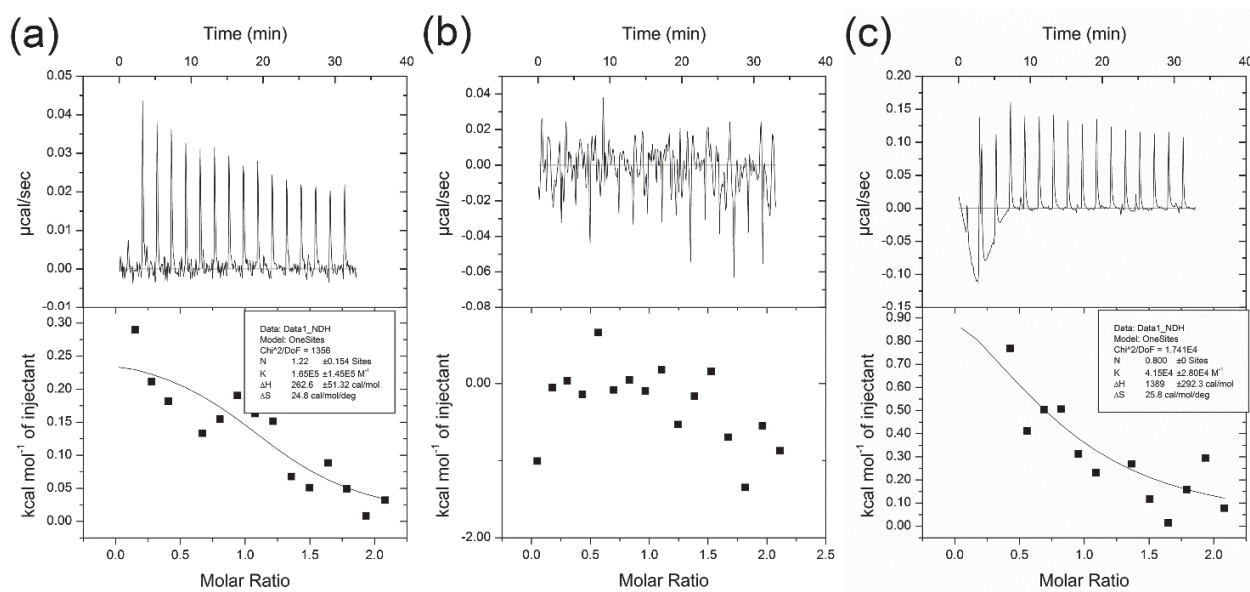

**Figure S4** ITC experiments and interaction studies of the YhdE\_D70A mutant with  $Mn^{2+}$ . (a) ITC titration curve of 400  $\mu M$   $Mn^{2+}$  into 40  $\mu M$  wild-type YhdE as a positive control. (b) ITC titration curve of 400  $\mu M$   $Mn^{2+}$  into the buffer as a negative control. (c) ITC titration curve of 400  $\mu M$  dTTP into 40  $\mu M$  YhdE\_D70A in the presence of 1 mM  $MnCl_2$ .

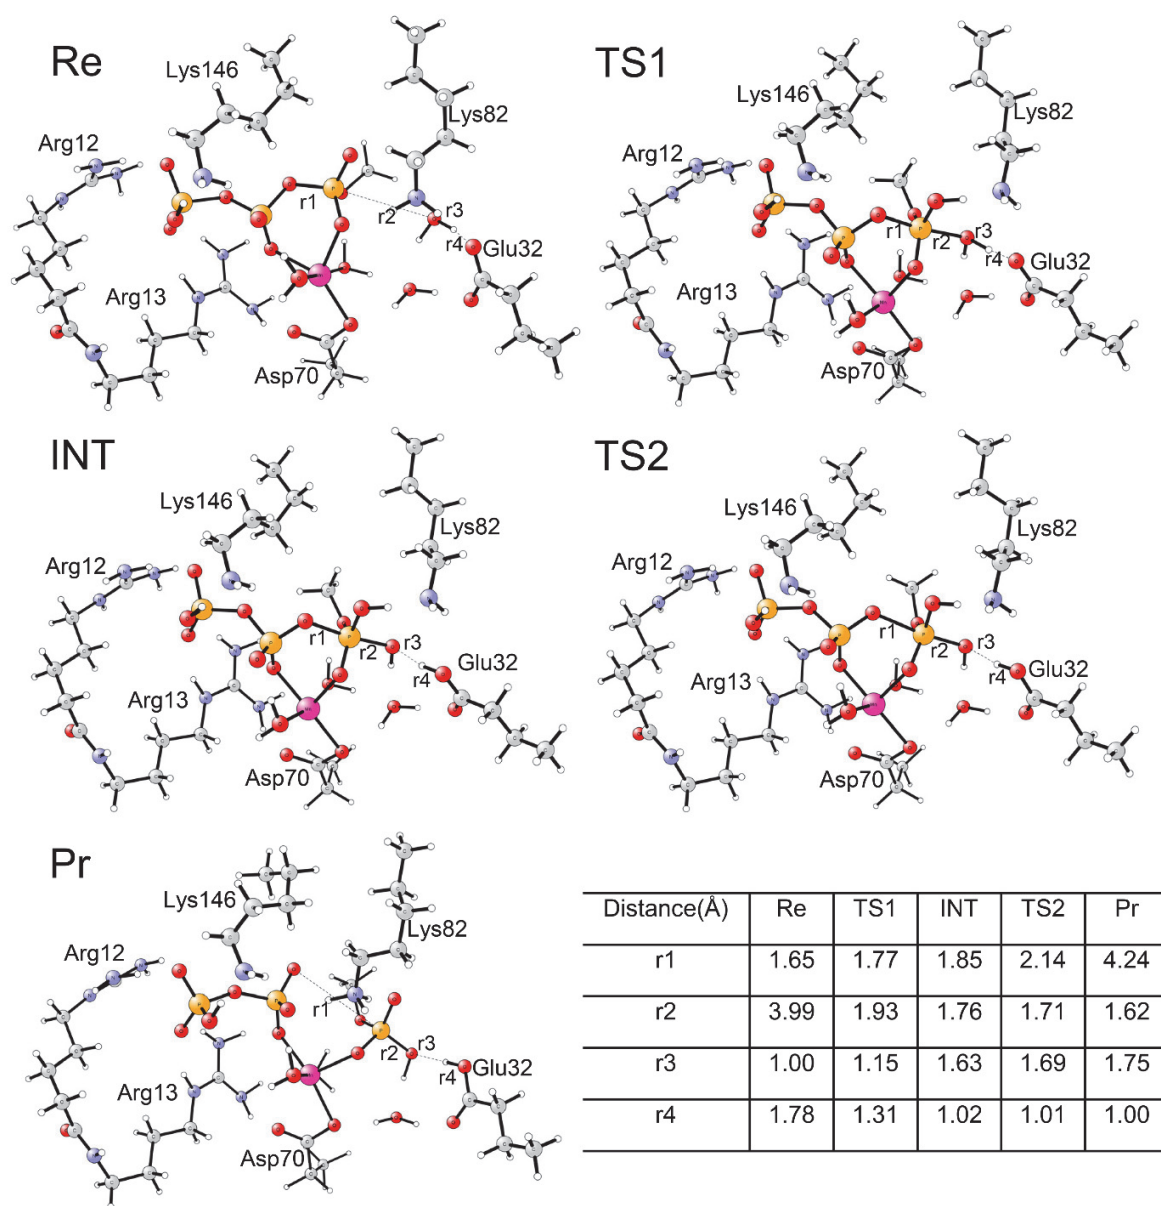

**Figure S5** Optimized structures of Reactant (Re), Transition state 1 (TS1), Intermediate (INT), Transition state 2 (TS2) and Product (Pr) in the stepwise pathway. The important distances (Å) for various stationary reaction coordinates along the pathway are listed in the lower right table.

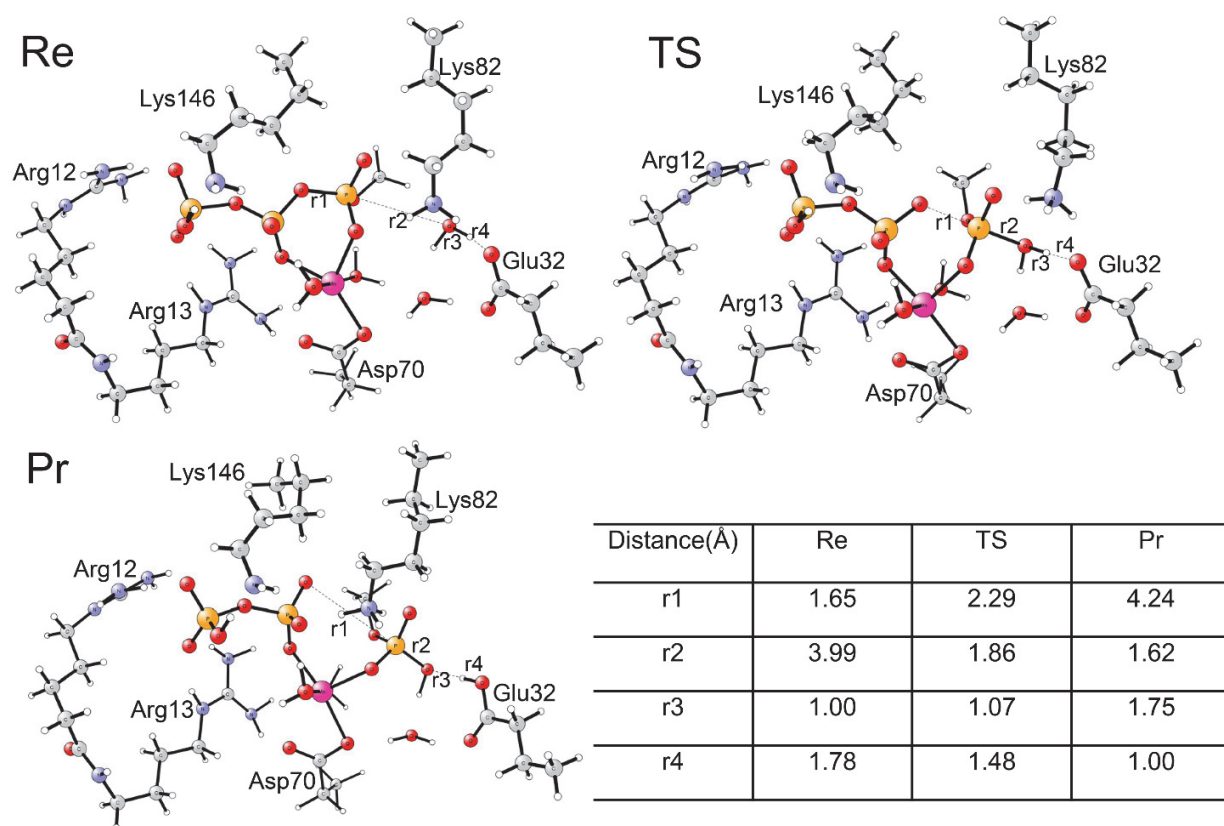

**Figure S6** Optimized structures of Reactant (Re), Transition state (TS) and Product (Pr) in the concerted pathway. The important distances (Å) for various stationary reaction coordinates along the pathway are given in the lower right table.

## Supplementary table

**Table S1** Data collection and refinement statistics of YhdE\_E33A crystal soaked with dTTP. Statistics for the highest-resolution shell are shown in parentheses.

|                                          |                                      |                              |                 |
|------------------------------------------|--------------------------------------|------------------------------|-----------------|
| Wavelength (Å)                           | 0.97899                              | R-work                       | 0.1789 (0.2135) |
| Resolution range (Å)                     | 33.59 - 2.04<br>(2.11 - 2.04)        | R-free                       | 0.2107 (0.2631) |
| Space group                              | P 4 <sub>3</sub>                     | Number of non-hydrogen atoms | 3181            |
| Unit cell                                | 71.234, 71.234 76.175;<br>90, 90, 90 | Protein residues             | 373             |
| Total number of reflections              | 168730                               | RMS (bonds, Å)               | 0.004           |
| Unique number of reflections             | 24274 (2380)                         | RMS (angles, °)              | 0.80            |
| Completeness (%)                         | 99.8(100)                            | Ramachandran favored (%)     | 97              |
| Mean I/sigma(I)                          | 12.9(9.5)                            | Ramachandran allowed (%)     | 3               |
| Wilson B-factor                          | 22.83                                | Ramachandran outliers (%)    | 0               |
| R-merge                                  | 0.071 (0.228)                        | Rotamer outliers (%)         | 1.7             |
| R-meas                                   | 0.078 (0.245)                        | Clashscore                   | 4.92            |
| CC 1/2                                   | 0.977                                | Average B-factor             | 28.87           |
| Number of reflections used in refinement | 24273 (2380)                         | Number of solvent molecules  | 34              |
| Number of reflections used for R-free    | 2033 (185)                           | Number of TLS groups         | 1               |
